# Supplementary material for: The role of oxidant stress and gender in the erythrocyte arginine metabolism and ammonia management in patients with type 2 diabetes
Source: PubMed Central journal article supplement (PMC6636741; doi:10.1371/journal.pone.0219481), 2019-07-17
Supplement: pone.0219481.s002.pdf [file pone.0219481.s002.pdf]

## Supplement 2.

Best fit distributions for all determinations.

The table reports D-statistics and p-values of the KS goodness of fit test for each of the 84 data sets. The KS test for goodness of fit performs a test of the distribution of an observed random variable against a given distribution under the null hypothesis that the two distributions are identical. The table also reports the MLEs for shape, location and scale parameters obtained from the maximum likelihood estimation needed to perform the KS tests. We fitted the data to the following distributions: beta, exponential, exponential-Weibull, exponential-power law, Gilbrat, logistic, lognormal, normal, Pareto, power law, Weibull minimum, and Weibull maximum.

**M: MALE**  
**F:FEMALE**

| <b>Goodness of fit test results</b> |       |               |                              |                    |                |                                                       |          |            |              |
|-------------------------------------|-------|---------------|------------------------------|--------------------|----------------|-------------------------------------------------------|----------|------------|--------------|
|                                     |       |               | <b>Best fit distribution</b> | <b>KS test</b>     |                | <b>Best fits MLEs (shape, c, location, and scale)</b> |          |            |              |
|                                     |       | <b>Gender</b> |                              | <b>D-statistic</b> | <b>p-value</b> | <b>S</b>                                              | <b>C</b> | <b>LOC</b> | <b>SCALE</b> |
| <b>Arginine</b>                     |       |               |                              |                    |                |                                                       |          |            |              |
| Control                             | RBC   | M             | lognormal                    | 0.16428            | 0.20659        | 0.376438                                              |          | 1.308643   | 5.47568      |
|                                     |       | F             | lognormal                    | 0.1665159          | 0.194354       | 1.29766                                               |          | 3.436246   | 0.67795      |
|                                     | Serum | M             | logistic                     | 0.1058             | 0.76317        |                                                       |          | 0.18254    | 0.037755     |
|                                     |       | F             | Power law                    | 0.149034           | 0.306546       | 1.45524                                               |          | 0.0614427  | 0.207557     |
| Diabetics                           | RBC   | M             | logistic                     | 0.123167           | 0.548778       |                                                       |          | 5.46838    | 0.747606     |
|                                     |       | F             | logistic                     | 0.185849           | 0.110702       |                                                       |          | 7.314805   | 1.144642     |
|                                     | Serum | M             | lognormal                    | 0.131201           | 0.4633701      | 0.501445                                              |          | 0.01789    | 0.114442     |
|                                     |       | F             | Exponential weibull          | 0.1779749          | 0.1402727      | 264.953                                               | 0.348029 | 0.056437   | 0.00075      |

| Nitrites   |       |   |                       |            |            |          |           |          |           |
|------------|-------|---|-----------------------|------------|------------|----------|-----------|----------|-----------|
| Control    | RBC   | M | logistic              | 0.172549   | 0.164134   |          |           | 117.5069 | 23.61217  |
|            |       | F | Exponential power law | 0.17374357 | 0.15862432 | 0.606062 |           | 71.99    | 61.42386  |
|            | Serum | M | Gilbrat               | 0.16669    | 0.19339    |          |           | 4.0619   | 11.44269  |
|            |       | F | Exponential weibull   | 0.244136   | 0.01386    | 188.6350 | 0.7192228 | 1.756299 | 1.16123   |
| Diabetics  | RBC   | M | Normal                | 0.13516759 | 0.424589   |          |           | 63.72999 | 14.67089  |
|            |       | F | logistic              | 0.140824   | 0.373169   |          |           | 72.97857 | 16.18652  |
|            | Serum | M | Exponential weibull   | 0.1201168  | 0.58358    | 7.625178 | 0.7439537 | 2.57963  | 13.2755   |
|            |       | F | logistic              | 0.21327    | 0.0447518  |          |           | 53.33497 | 10.4515   |
| Citrulline |       |   |                       |            |            |          |           |          |           |
| Control    | RBC   | M | normal                | 0.105069   | 0.77309    |          |           | 141.40   | 47.50778  |
|            |       | F | logistic              | 0.2543139  | 0.009089   |          |           | 181.1275 | 9.6051    |
|            | Serum | M | logistic              | 0.13439    | 0.4319     |          |           | 243.0979 | 21.0271   |
|            |       | F | logistic              | 0.20107    | 0.068019   |          |           | 225.874  | 33.9907   |
| Diabetics  | RBC   | M | logistic              | 0.14268    | 0.357215   |          |           | 294.8807 | 40.30802  |
|            |       | F | logistic              | 0.3039     | 0.00089    |          |           | 350.9909 | 43.272149 |
|            | Serum | M | logistic              | 0.1356     | 0.420248   |          |           | 569.447  | 138.6046  |
|            |       | F | logistic              | 0.19474    | 0.08367    |          |           | 663.5169 | 126.9296  |
| Ornithine  |       |   |                       |            |            |          |           |          |           |
| Control    | RBC   | M | normal                | 0.15339    | 0.2749     |          |           | 181.375  | 33.34268  |
|            |       | F | logistic              | 0.2162146  | 0.04031    |          |           | 121.2159 | 22.90108  |
|            | Serum | M | beta                  | 0.13549    | 0.421465   | 0.779    | 0.80878   | 40.999   | 53.0000   |
|            |       | F | logistic              | 0.2164117  | 0.040027   |          |           | 58.57125 | 5.34658   |

|                |       |   |                     |                          |                             |                        |                            |                        |                            |
|----------------|-------|---|---------------------|--------------------------|-----------------------------|------------------------|----------------------------|------------------------|----------------------------|
| Diabetics      | RBC   | M | beta                | 0.1592246                | 0.2364787                   | 0.926456               | 0.876421                   | 111.78034              | 147.219                    |
|                |       | F | beta                | 0.180789                 | 0.129046                    | 5.033445               | 5.316408                   | 37.070529              | 361.411                    |
|                | Serum | M | beta                | 0.11707                  | 0.619573                    | 33.18864               | 118.1394<br>3              | -14.5890               | 396.721                    |
|                |       | F | lognormal           | 0.10228639               | 0.7967729                   | 0.155339               |                            | -50.3064               | 110.7159                   |
| <b>Ammonia</b> |       |   |                     |                          |                             |                        |                            |                        |                            |
| Control        | RBC   | M | normal              | 0.11059                  | 0.70025                     |                        |                            | 283.69                 | 96.0086                    |
|                |       | F | Weibull min         | 0.1875639                | 0.1049                      | 8.09089                |                            | -448.231               | 817.935                    |
|                | Serum | M | logistic            | 0.11757                  | 0.61361                     |                        |                            | 50.217                 | 11.7051                    |
|                |       | F | logistic            | 0.13425178               | 0.4333437                   |                        |                            | 47.37623               | 11.17336                   |
| Diabetics      | RBC   | M | exponential         | 0.1260418                | 0.51717                     |                        |                            | 421.9                  | 110.3324                   |
|                |       | F | beta                | 0.20026                  | 0.069869                    | 0.546337               | 0.7173                     | 151.3328               | 635.667                    |
|                | Serum | M | Exponential weibull | 0.115537                 | 0.6382                      | 172.4512               | 0.31065                    | 17.6645                | 0.25214                    |
|                |       | F | Exponential weibull | 0.16989                  | 0.1769                      | 0.7432                 | 4.3299                     | 26.99329               | 133.655                    |
| <b>Glucose</b> |       |   |                     |                          |                             |                        |                            |                        |                            |
| Control        | Serum | M | logistic            | 0.081408944<br>596202959 | 0.9536255<br>919196701<br>1 |                        |                            | 93.725473<br>513127511 | 6.238150<br>7297077<br>894 |
|                |       | F | beta                | 0.063350994<br>697624063 | 0.9971241<br>849744263<br>4 | 1.3749395<br>301794118 | 1.606979<br>8014712<br>964 | 72.619931<br>937412161 | 33.22637<br>3503722<br>144 |
| Diabetics      | Serum | M | logistic            | 0.090438340<br>854283983 | 0.8990682<br>324914032<br>2 |                        |                            | 138.91353<br>881897874 | 13.27482<br>9228028<br>919 |

|                      |       |   |                     |                          |                             |                             |                           |                        |                            |
|----------------------|-------|---|---------------------|--------------------------|-----------------------------|-----------------------------|---------------------------|------------------------|----------------------------|
|                      |       | F | logistic            | 0.090438729<br>689889474 | 0.8990653<br>936500915<br>3 |                             |                           | 145.91351<br>68365886  | 13.27482<br>8567766<br>228 |
| <b>Triglycerides</b> |       |   |                     |                          |                             |                             |                           |                        |                            |
| Control              | Serum | M | beta                | 0.066488671<br>353012174 | 0.9944366<br>138051757<br>8 | 1.3080556<br>507522143      | 2.228276<br>3963225<br>34 | 117.46346<br>521215393 | 88.21505<br>3015371<br>51  |
|                      |       | F | lognormal           | 0.050725721<br>131268608 | 0.9999513<br>424877253<br>3 | 0.2800856<br>283210819<br>7 |                           | 82.668758<br>514730399 | 58.26927<br>4000802<br>035 |
| Diabetics            | Serum | M | Power law           | 0.072821242<br>806068831 | 0.9837859<br>443169908<br>5 | 1.0503315<br>544364957      |                           | 110.83600<br>096980945 | 117.1639<br>9904116<br>679 |
|                      |       | F | logistic            | 0.125378227<br>85665176  | 0.5243675<br>007596269      |                             |                           | 180.32412<br>08668489  | 18.77145<br>4092377<br>226 |
| <b>AST</b>           |       |   |                     |                          |                             |                             |                           |                        |                            |
| Control              | Serum | M | logistic            | 0.08826                  | 0.91433                     |                             |                           | 16.88085               | 2.46169                    |
|                      |       | F | Exponential weibull | 0.1074                   | 0.741336                    | 62.25524                    | 0.371341                  | 16.064                 | 0.14432                    |
| Diabetics            | Serum | M | lognorm             | 0.08239                  | 0.9488389                   | 0.048275                    |                           | -115.279               | 135.1256                   |
|                      |       | F | logistic            | 0.09083                  | 0.896173                    |                             |                           | 22.86877               | 5.9587                     |

| <b>ALT</b>  |       |   |                       |           |           |          |          |          |               |
|-------------|-------|---|-----------------------|-----------|-----------|----------|----------|----------|---------------|
| Control     | Serum | M | beta                  | 0.0911538 | 0.8937    | 0.82809  | 0.834268 | 10.82046 | 23.1795       |
|             |       | F | lognormal             | 0.108019  | 0.733746  | 0.53737  |          | 4.58654  | 18.59916      |
| Diabetics   | Serum | M | lognormal             | 0.078179  | 0.96738   | 0.4835   |          | 3.714734 | 13.6584       |
|             |       | F | exponencial           | 0.0798559 | 0.96062   |          |          | 13.99999 | 11.00000      |
| <b>Urea</b> |       |   |                       |           |           |          |          |          |               |
| Control     | RBC   | M | logistic              | 0.055941  | 0.999628  |          |          | 1.090576 | 0.138671      |
|             |       | F | Weibull max           | 0.0831389 | 0.944997  | 4.696647 |          | 2.359825 | 1.369000<br>1 |
|             | Serum | M | Exponential weibull   | 0.1365117 | 0.411958  | 241.607  | 0.31885  | 0.09082  | 0.00098       |
|             |       | F | Pareto                | 0.125705  | 0.520812  | 1.722121 |          | -0.07716 | 0.30716       |
| Diabetics   | RBC   | M | Exponential power law | 0.0893481 | 0.9068708 | 0.801215 |          | 1.429999 | 1.135783<br>2 |
|             |       | F | Power law             | 0.120292  | 0.5815448 | 0.513628 |          | 1.399999 | 3.986721      |
|             | Serum | M | Weibull max           | 0.1346946 | 0.429095  | 1.273849 |          | 2.853879 | 1.220335      |
|             |       | F | Lognormal             | 0.178396  | 0.1385406 | 1.777346 |          | 0.20823  | 0.178658      |

| <b>Uric Acid</b> |       |   |                       |                         |                             |                             |                     |                             |                            |
|------------------|-------|---|-----------------------|-------------------------|-----------------------------|-----------------------------|---------------------|-----------------------------|----------------------------|
| Control          | RBC   | M | Beta                  | 0.0727379               | 0.98398                     | 1.180507                    | 1.204808            | 89.513640                   | 91.0476                    |
|                  |       | F | Power law             | 0.0740678               | 0.980643                    | 1.027318                    |                     | 75.86255                    | 77.13744<br>3              |
|                  | Serum | M | Normal                | 0.052033                | 0.999914                    |                             |                     | 179.0                       | 28.64698                   |
|                  |       | F | Beta                  | 0.0531758               | 0.99986                     | 1.47233                     | 1.472038            | 93.82706                    | 122.342                    |
| Diabetics        | RBC   | M | Power Law             | 0.065469                | 0.99546                     | 1.054462                    |                     | 106.8278                    | 112.1721<br>2              |
|                  |       | F | Logistic              | 0.0780                  | 0.9680579                   |                             |                     | 124.7667                    | 14.00563                   |
|                  | Serum | M | Normal                | 0.096925                | 0.846604                    |                             |                     | 115.0                       | 19.77498                   |
|                  |       | F | Logistic              | 0.05525487              | 0.9997059                   |                             |                     | 99.08868                    | 7.923599                   |
| <b>Insulin</b>   |       |   |                       |                         |                             |                             |                     |                             |                            |
| Control          | Serum | M | Gilbrat               | 0.10527929<br>81056267  | 0.7702725<br>379791903<br>7 |                             |                     | 0.8046671<br>667729976      | 3.964270<br>34267          |
|                  |       | F | Exponential weibull   | 0.10652752<br>873175297 | 0.7535267<br>607471305<br>4 | 0.5491192<br>69432          | 1.608146<br>1296582 | 0.8999999<br>9999           | 11.17150<br>86177          |
| Diabetics        | Serum | M | Exponential power law | 0.10763362<br>428626033 | 0.7388371<br>380017337<br>8 | 0.8653579<br>226691445<br>7 |                     | 0.8999999<br>999999999      | 15.99069<br>6373731<br>73  |
|                  |       | F | Exponential power law | 0.11440802<br>219086182 | 0.6520991<br>336286459<br>1 | 0.9045662<br>010909651<br>9 |                     | 0.5999999<br>999999998<br>7 | 15.93732<br>9905210<br>767 |

| <b>Cholesterol</b>                                                                                                               |       |   |                       |                              |                             |                             |                             |                             |                             |
|----------------------------------------------------------------------------------------------------------------------------------|-------|---|-----------------------|------------------------------|-----------------------------|-----------------------------|-----------------------------|-----------------------------|-----------------------------|
| Control                                                                                                                          | Serum | M | Logistic              | 0.090658<br>97243857         | 0.8974510<br>9483425        |                             |                             | 138.2493<br>10229853        | 7.87133112<br>541001        |
|                                                                                                                                  |       | F | Logistic              | 0.073120<br>66557571         | 0.9830662<br>1579965        |                             |                             | 148.6439<br>49735496        | 9.11033657<br>567190        |
| Diabetics                                                                                                                        | Serum | M | Logistic              | 0.095026<br>13675456         | 0.8629584<br>7141137        |                             |                             | 175.2736<br>25810287        | 13.7527295<br>581938        |
|                                                                                                                                  |       | F | Beta                  | 0.067709<br>5554162          | 0.9929899<br>7054454        | 1.9485887<br>4571129        | 1.568515<br>16583062        | 143.5902<br>89590161        | 74.9250143<br>789352        |
| <b>Arginase</b>                                                                                                                  |       |   |                       |                              |                             |                             |                             |                             |                             |
| Control                                                                                                                          | RBC   | M | Beta                  | 0.104498<br>7074427<br>9033  | 0.780833<br>4645011<br>0724 | 2.0302516<br>91567783<br>7  | 1.874457<br>95623585<br>52  | 1.507798<br>31894966<br>82  | 2.1297500<br>482998735      |
|                                                                                                                                  |       | F | Exponential power law | 0.065453<br>1580446<br>34585 | 0.995475<br>9705880<br>5426 |                             | 1.333711<br>76387156<br>08  | 0.869440<br>75558670<br>197 | 2.0096885<br>672227129      |
| Diabetics                                                                                                                        | RBC   | M | Exponential weibull   | 0.088015<br>3621434<br>86819 | 0.915974<br>0610537<br>5323 | 0.1618060<br>07842946<br>74 | 6.128180<br>21597617<br>25  | 1.258926<br>72047072<br>55  | 9.2735610<br>116041869      |
|                                                                                                                                  |       | F | Exponential Weibull   | 0.097539<br>4288817<br>31505 | 0.841154<br>9359983<br>1437 | 42.691247<br>75675327       | 0.501408<br>53138826<br>524 | 1.265211<br>50194846<br>93  | 0.1266454<br>523447220<br>5 |
| MLEs: Maximum likelihood estimators for shape, location and scale parameters for data of each determination according to gender. |       |   |                       |                              |                             |                             |                             |                             |                             |
